# Supplementary material for: Synthesis and application of 3,4,7,8-tetrakis-exo-methylenecycloocta-1,5-diene as a versatile Diels–Alder diene: synthesis of V-shaped cyclooctatetraene fused acenes
Source: Royal Society of Chemistry journal article supplement (doi:10.1039/d0ob01544j), 2020-01-01
Supplement: d0ob01544j1.pdf [file d0ob01544j1.pdf]

## Synthesis and application of **3,4,7,8-tetrakis-exo-methylenecycloocta-1,5-diene** as a versatile Diels-Alder diene. Synthesis of V-shaped cyclooctatetraene fused acenes

Savita Gadigennavar<sup>a</sup> and Sethuraman Sankararaman<sup>\*a</sup>

### Supporting Information

| Contents                                                                                                                                                  | Page no. |
|-----------------------------------------------------------------------------------------------------------------------------------------------------------|----------|
| 1. <sup>1</sup> H and <sup>13</sup> C NMR spectra of compounds <b>2, 1, 3, 4a, (4a+4b), 5, 6, 7c, 8c</b><br><b>9c, 10c, 11, 12, 13b, 13c, 14b and 14c</b> | S2-S18   |
| 2. Table 1 Crystallographic data for <b>4a</b>                                                                                                            | S19      |
| 3. Table 2 Crystallographic data for <b>14c</b>                                                                                                           | S20      |
| 4. Table 3 Crystallographic data for <b>13b</b>                                                                                                           | S21      |

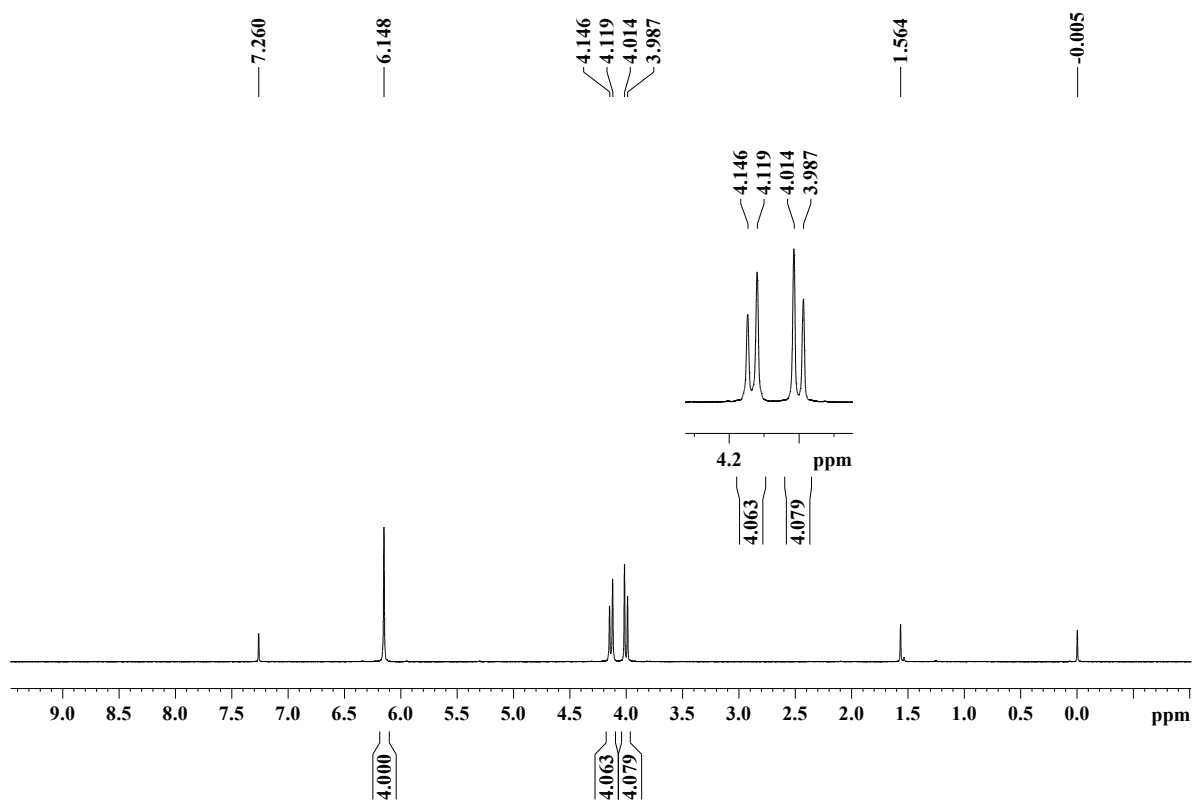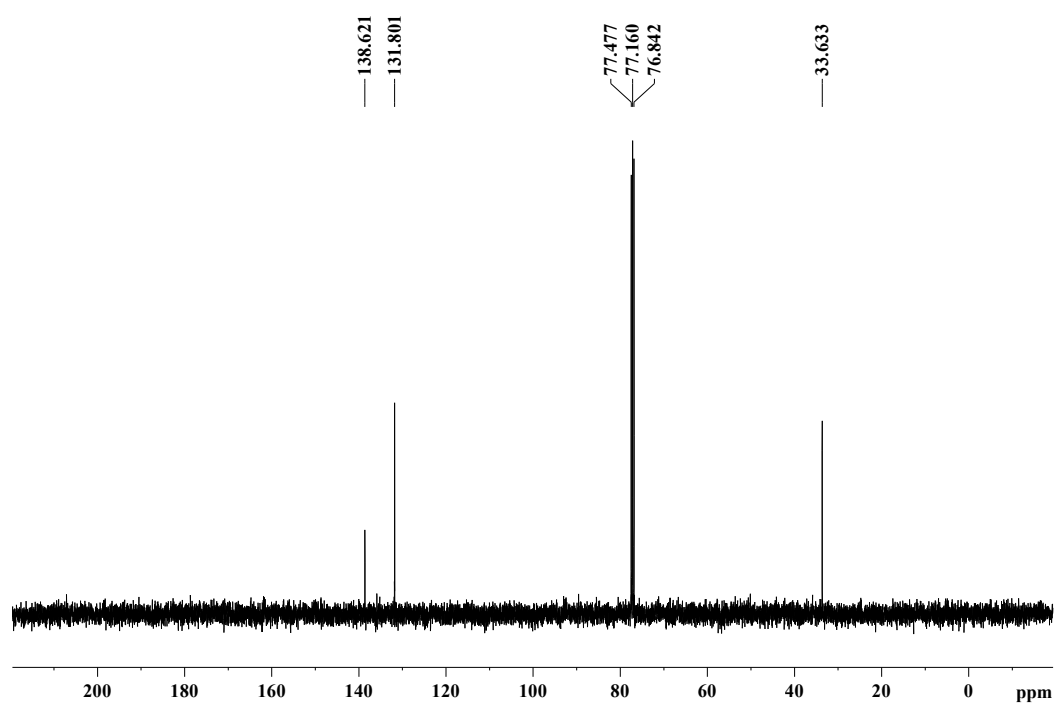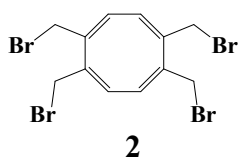

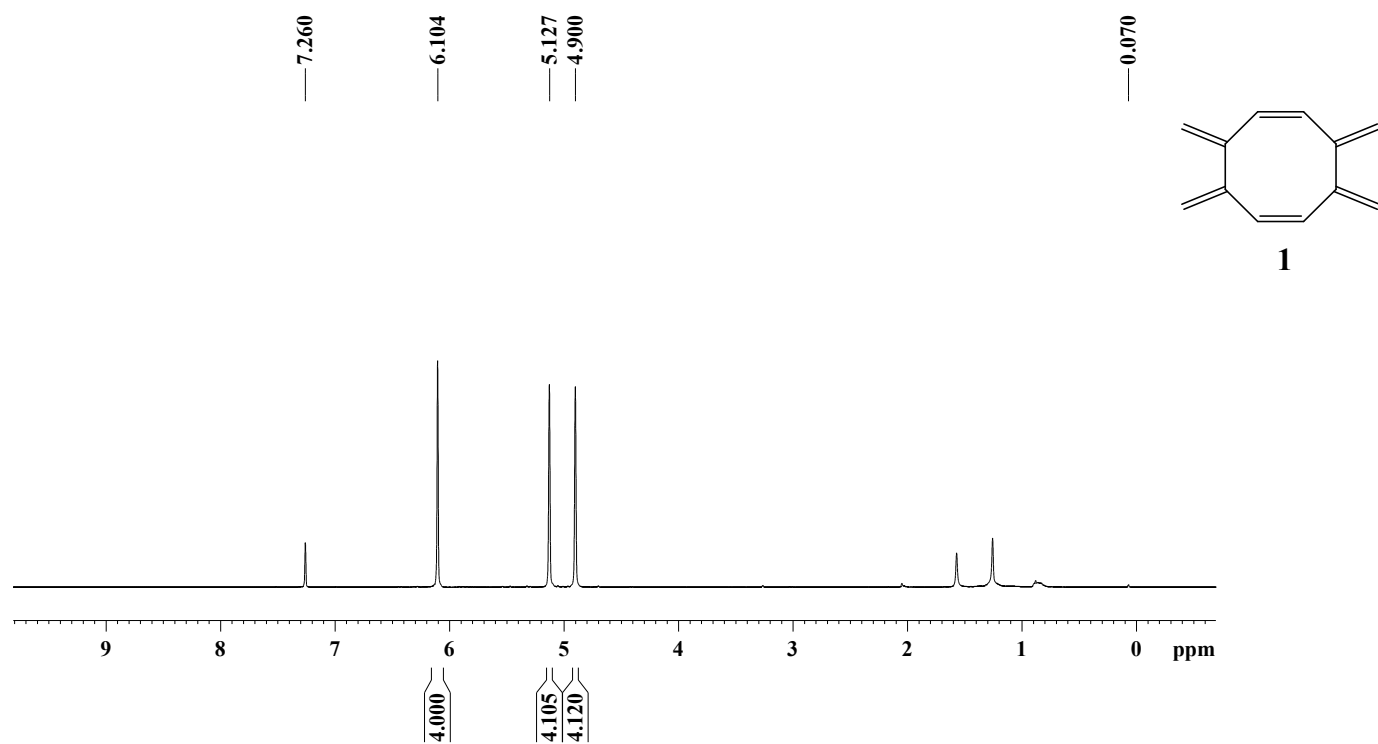

**Figure 3** 400 MHz  $^1\text{H}$  NMR spectrum of **1** in  $\text{CDCl}_3$

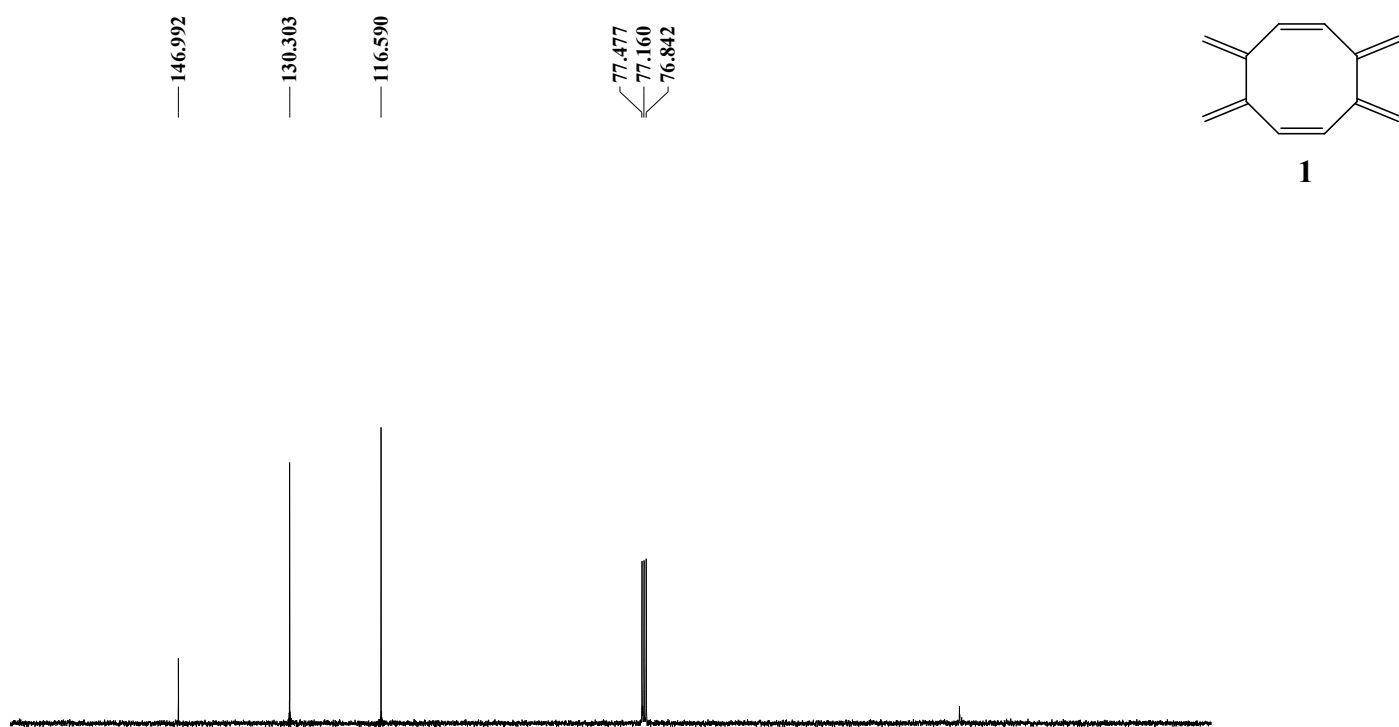

**Figure 4** 100 MHz  $^{13}\text{C}$  NMR spectrum of **1** in  $\text{CDCl}_3$

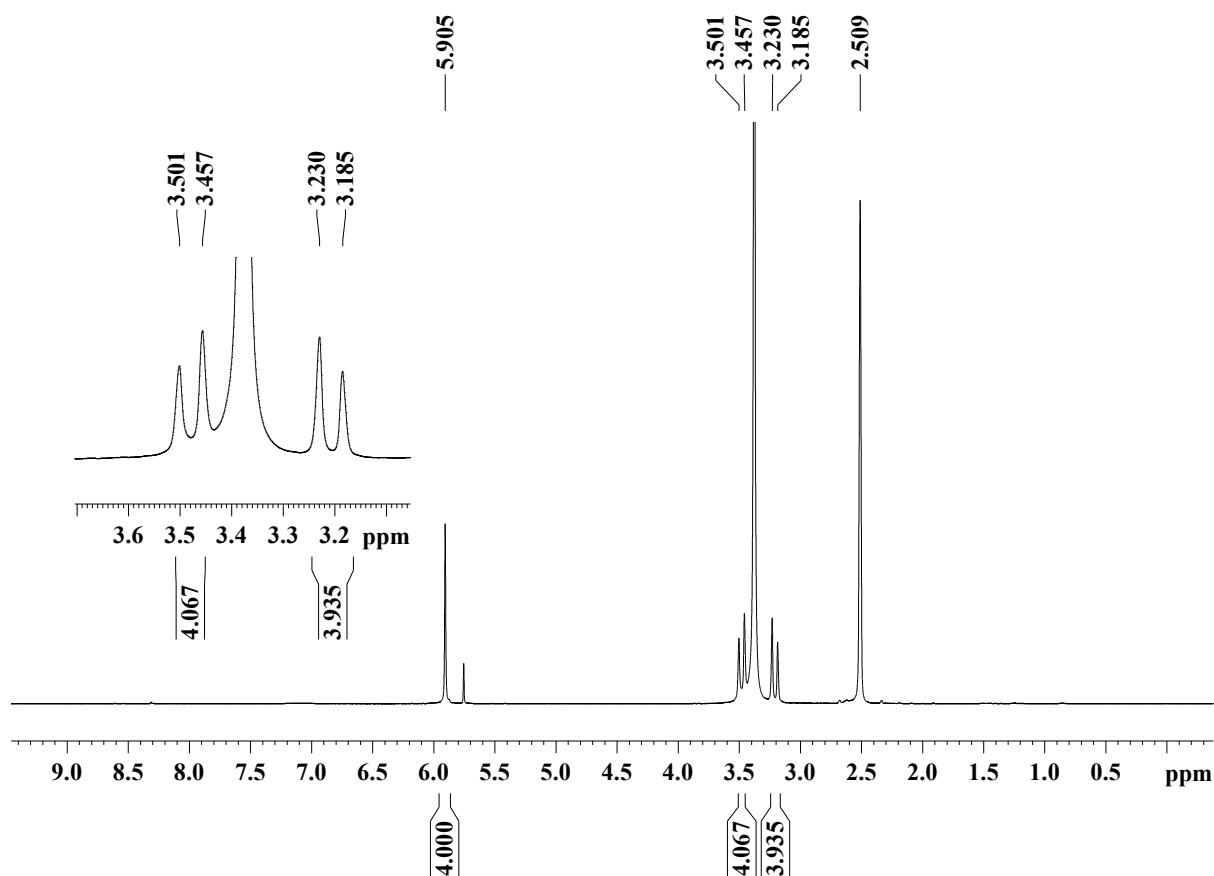

**Figure 5** 400 MHz  $^1\text{H}$  NMR spectrum of **3** in  $\text{DMSO-d}_6$

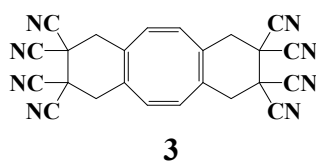

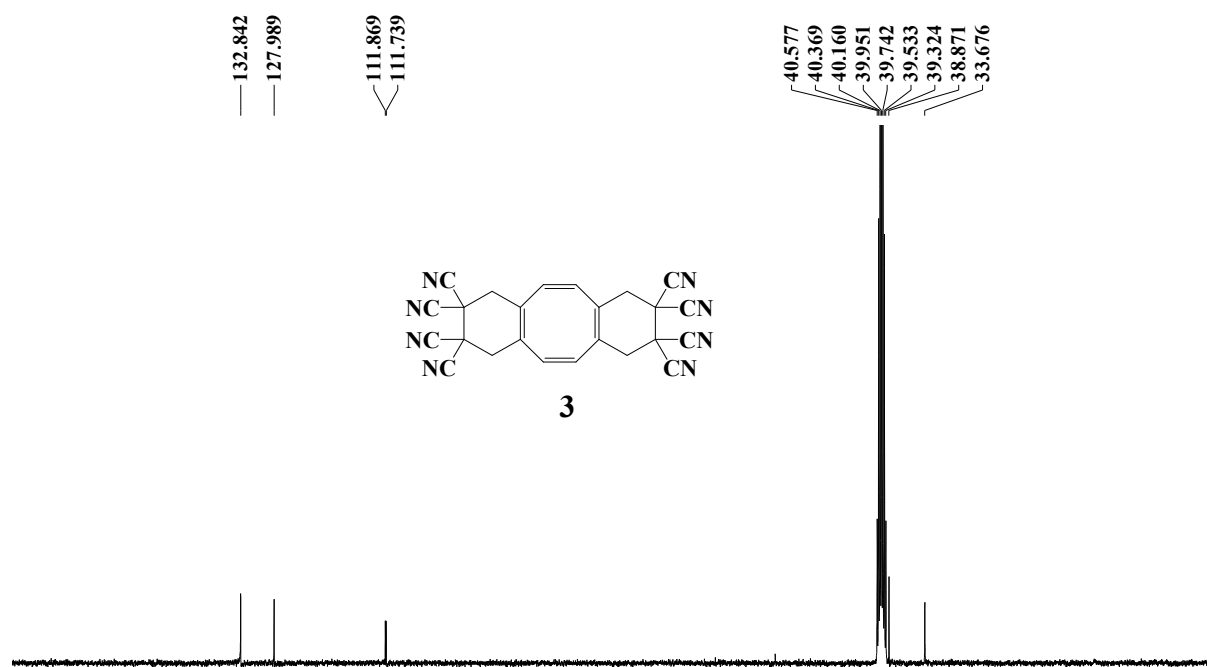

Figure 6 100 MHz  $^{13}\text{C}$  NMR spectrum of **3** in DMSO- $\text{d}_6$

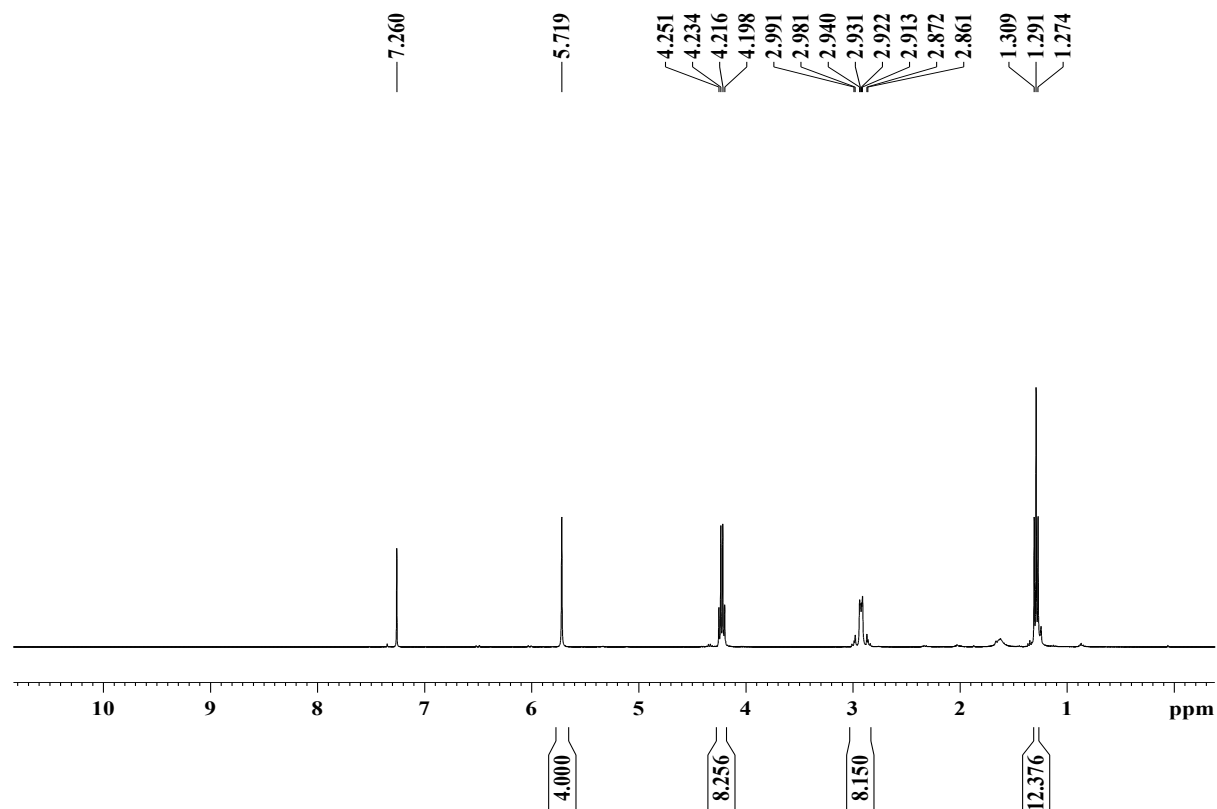

Figure 7 400 MHz  $^1\text{H}$  NMR spectrum of **4a** in  $\text{CDCl}_3$

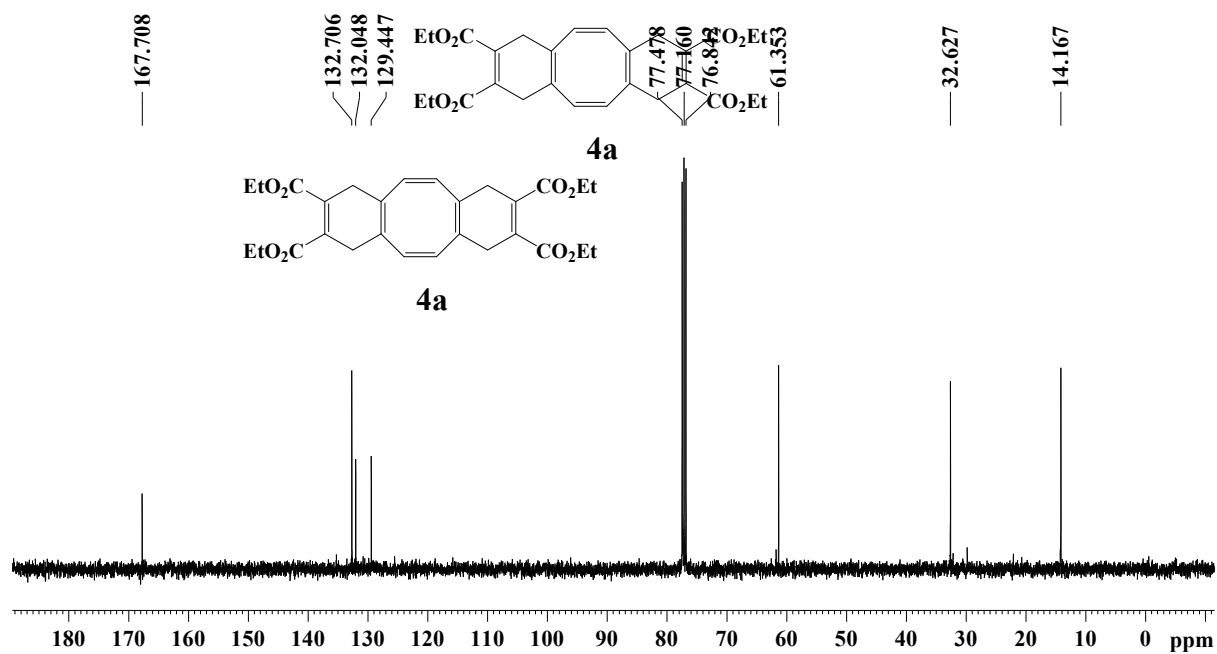

Figure 8 100 MHz  $^{13}\text{C}$  NMR spectrum of **4a** in  $\text{CDCl}_3$

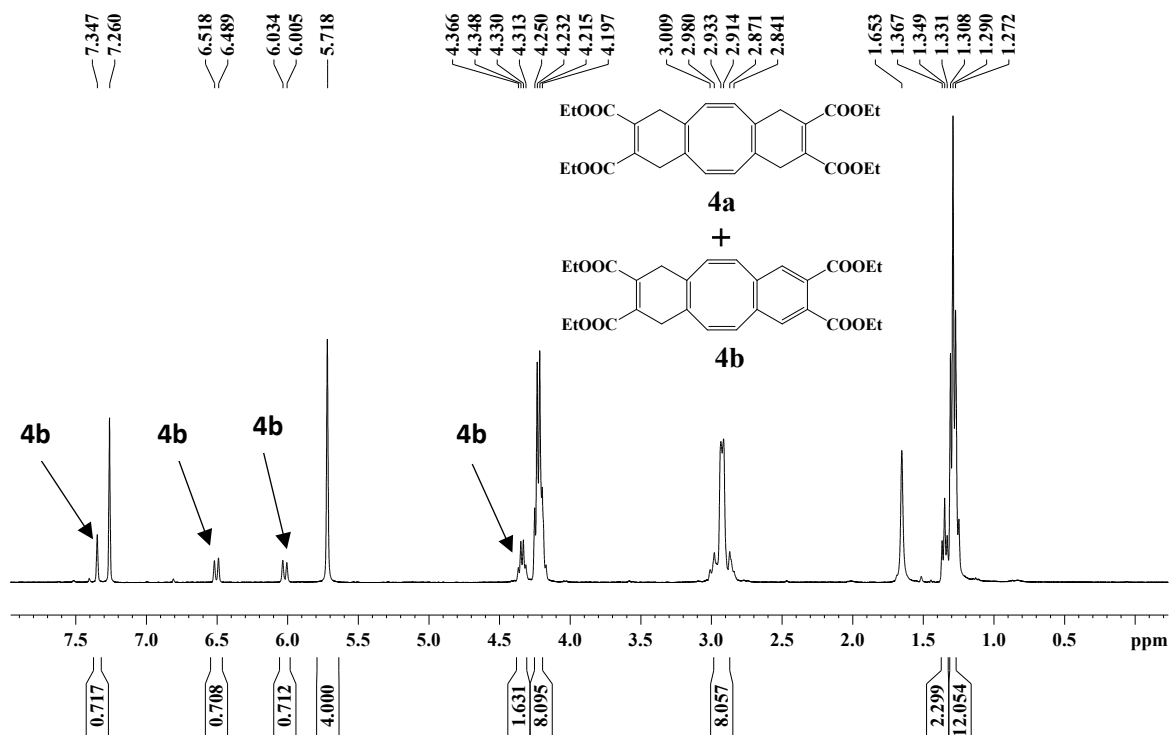

Figure 9 400 MHz  $^1\text{H}$  NMR spectrum of a mixture of **4a** and **4b** in  $\text{CDCl}_3$

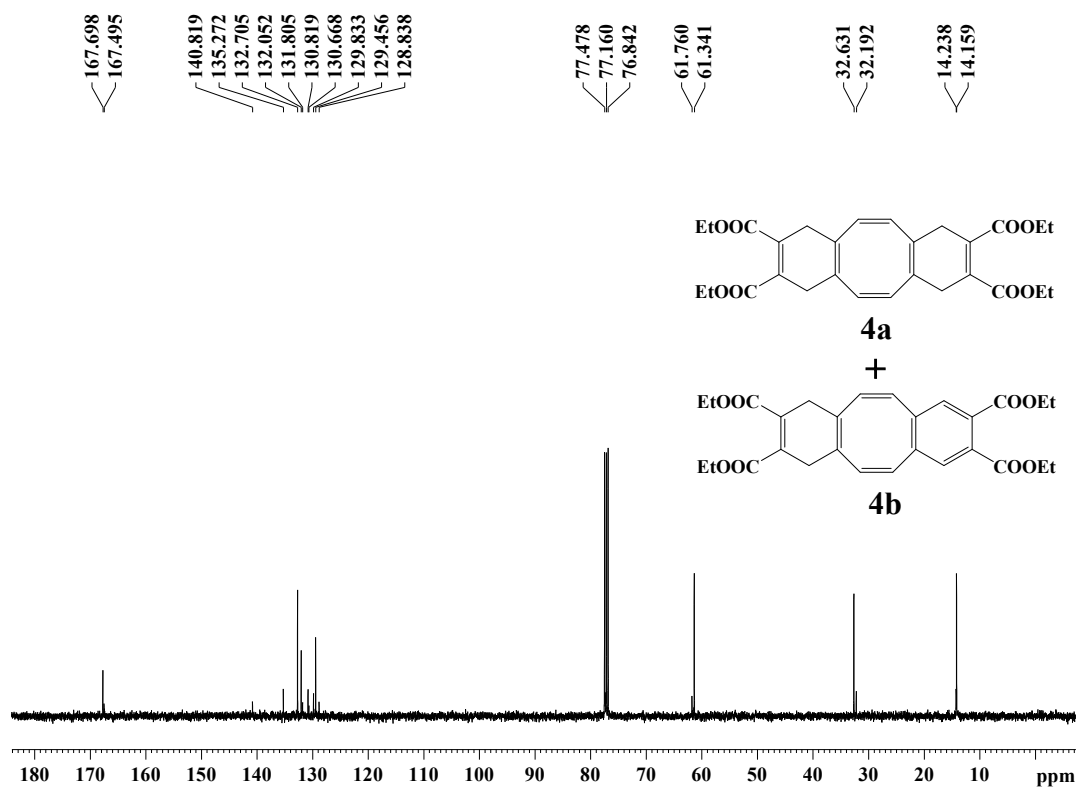

Figure 10 100 MHz  $^{13}\text{C}$  NMR spectrum of a mixture of **4a** and **4b** in  $\text{CDCl}_3$

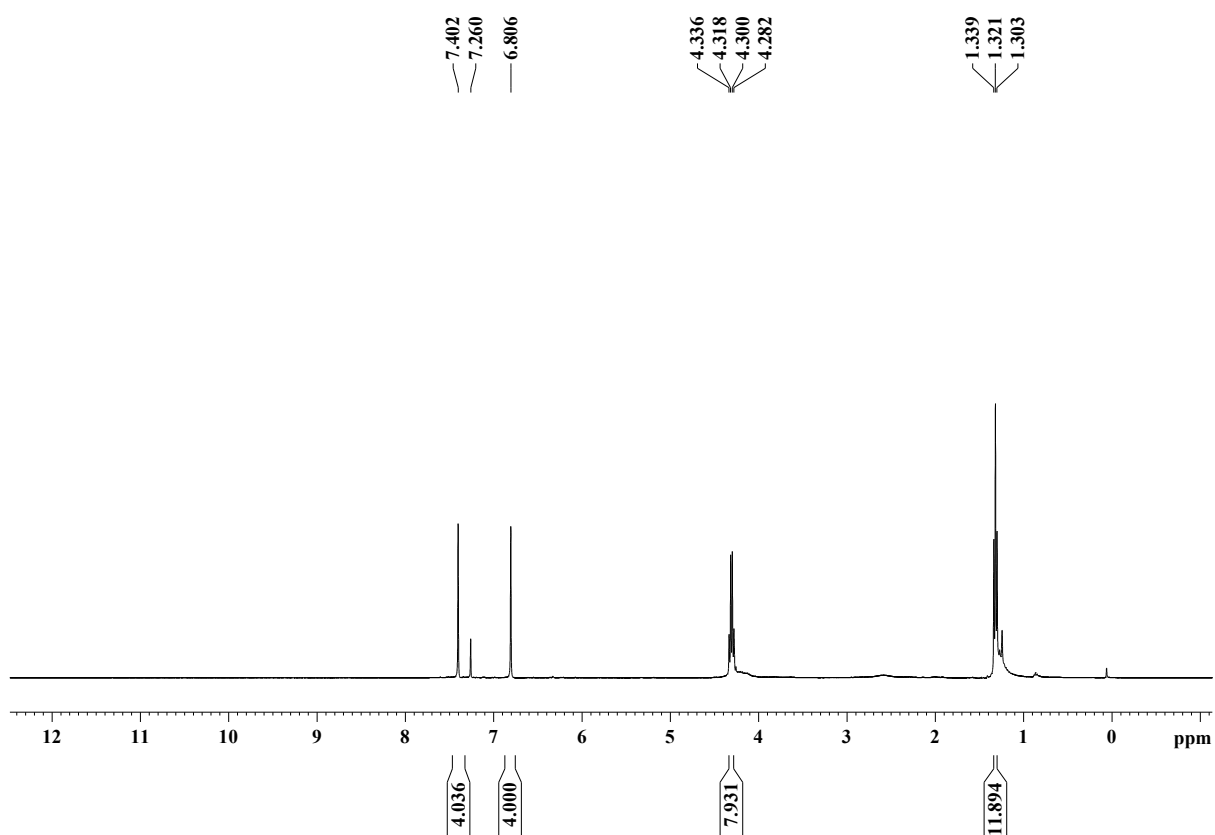

Figure 11 400 MHz  $^1\text{H}$  NMR spectrum of **5** in  $\text{CDCl}_3$

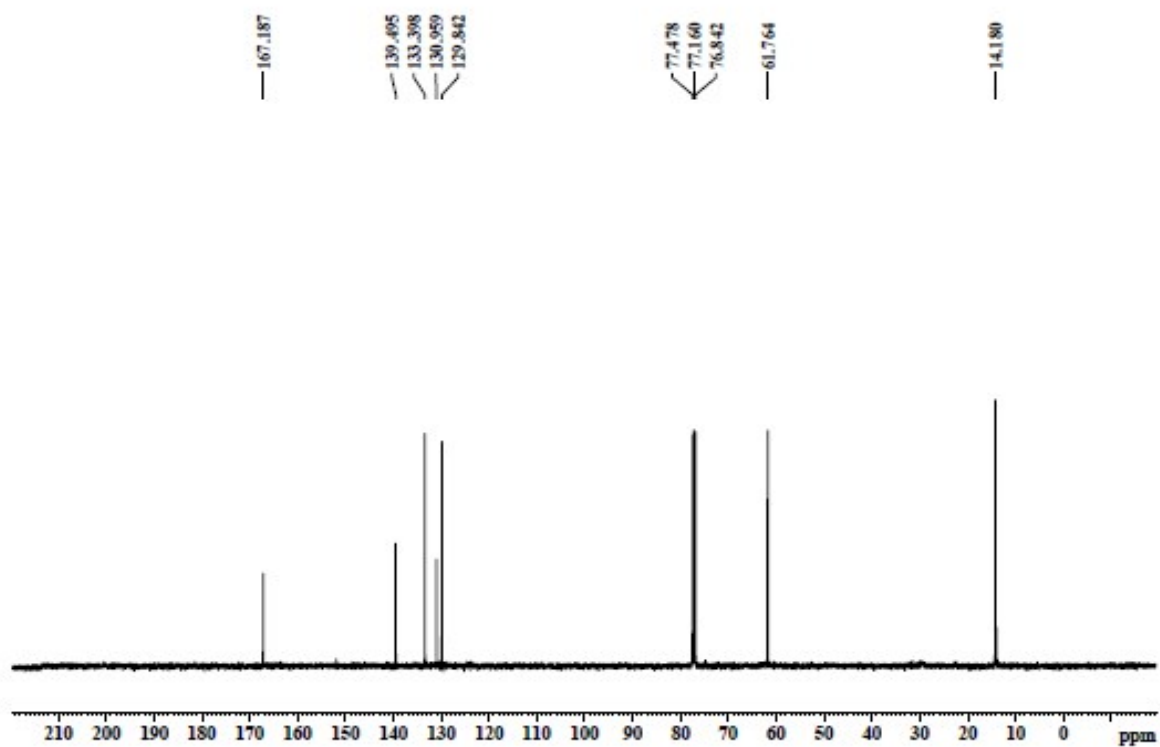

Figure 1 100 MHz  $^{13}\text{C}$  NMR spectrum of **5** in  $\text{CDCl}_3$

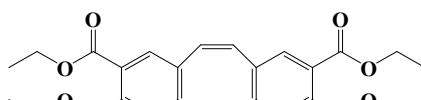



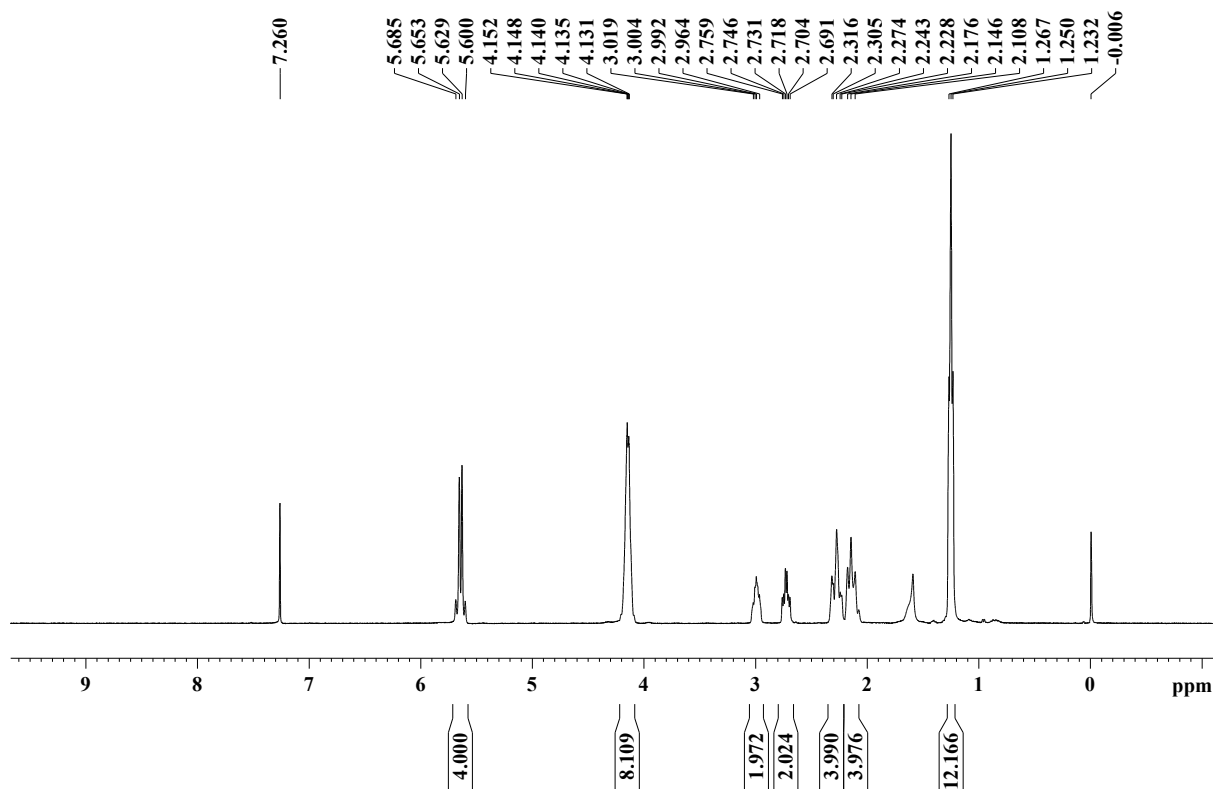

Figure 2 400 MHz  $^1\text{H}$  NMR spectrum of **6** in  $\text{CDCl}_3$

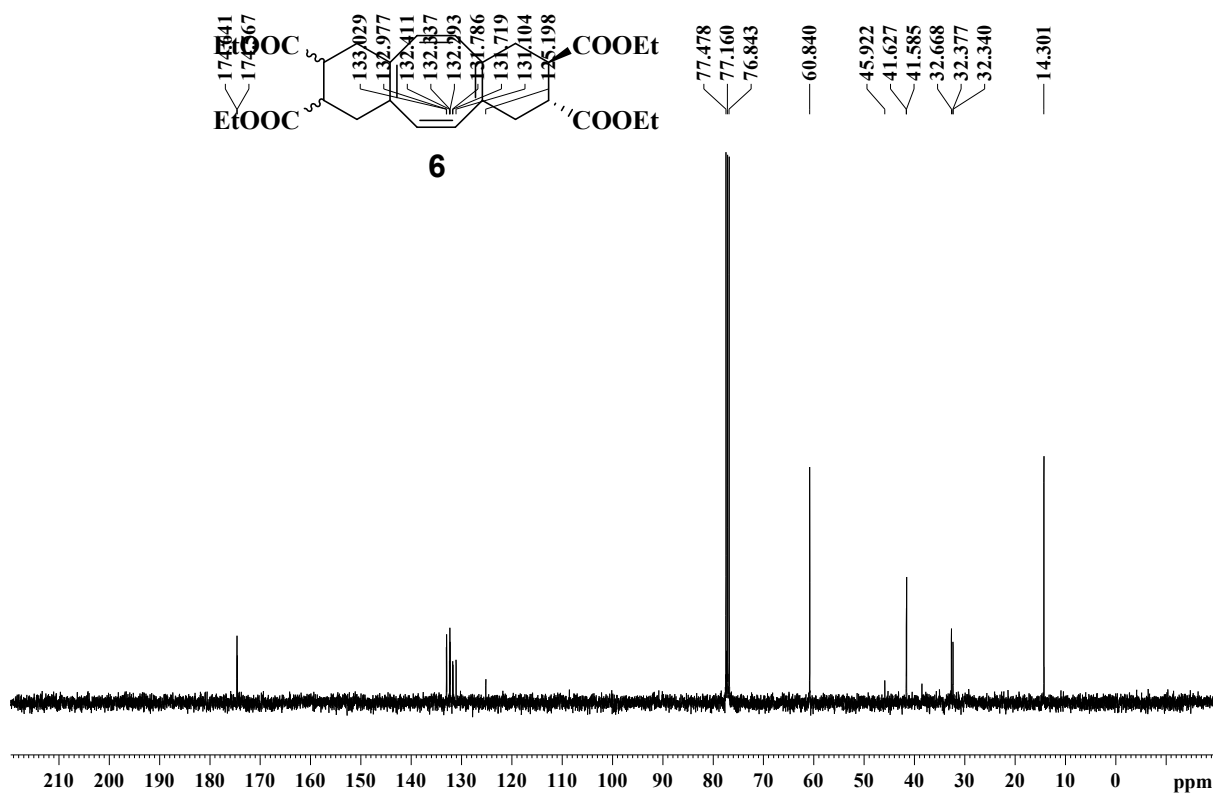

Figure 3 100 MHz  $^{13}\text{C}$  NMR spectrum of **6** in  $\text{CDCl}_3$

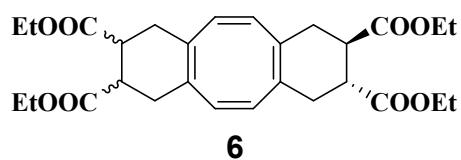

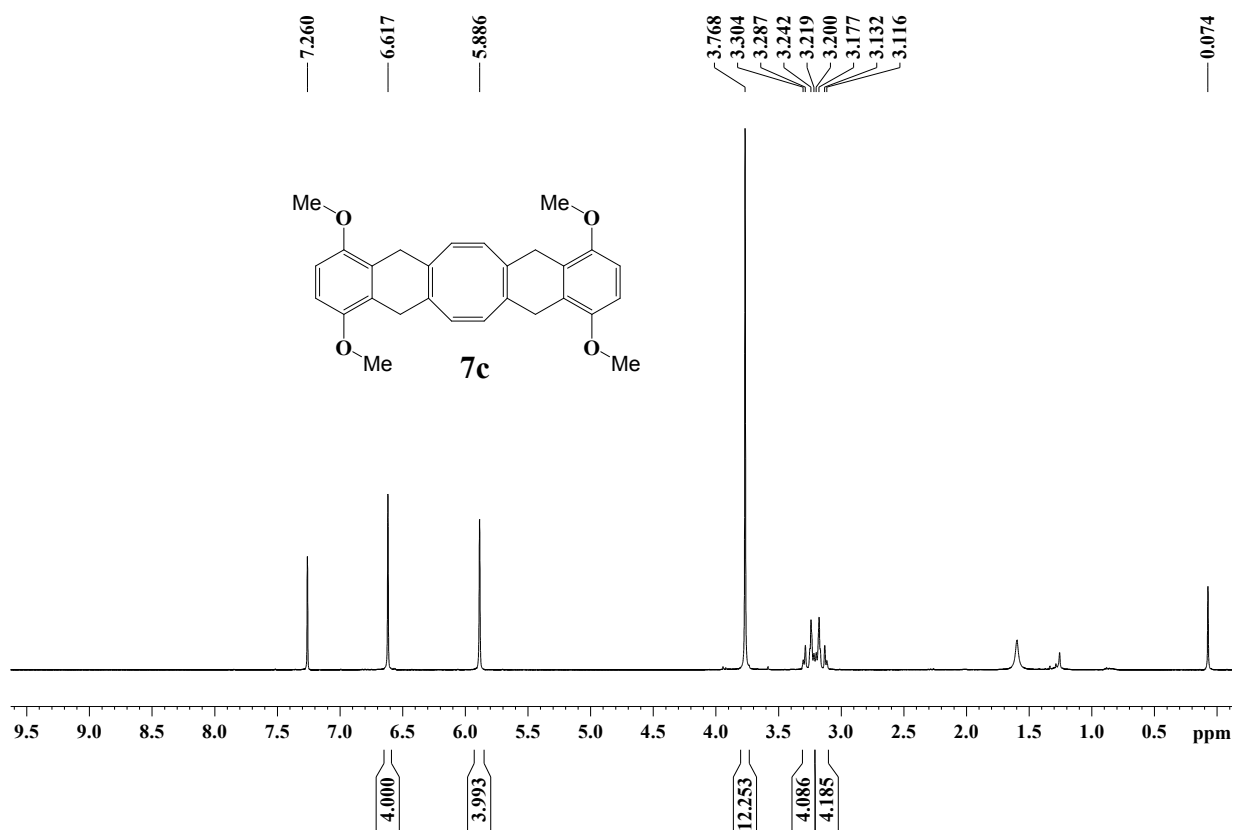

Figure 4 400 MHz  $^1\text{H}$  NMR spectrum of **7c** in  $\text{CDCl}_3$

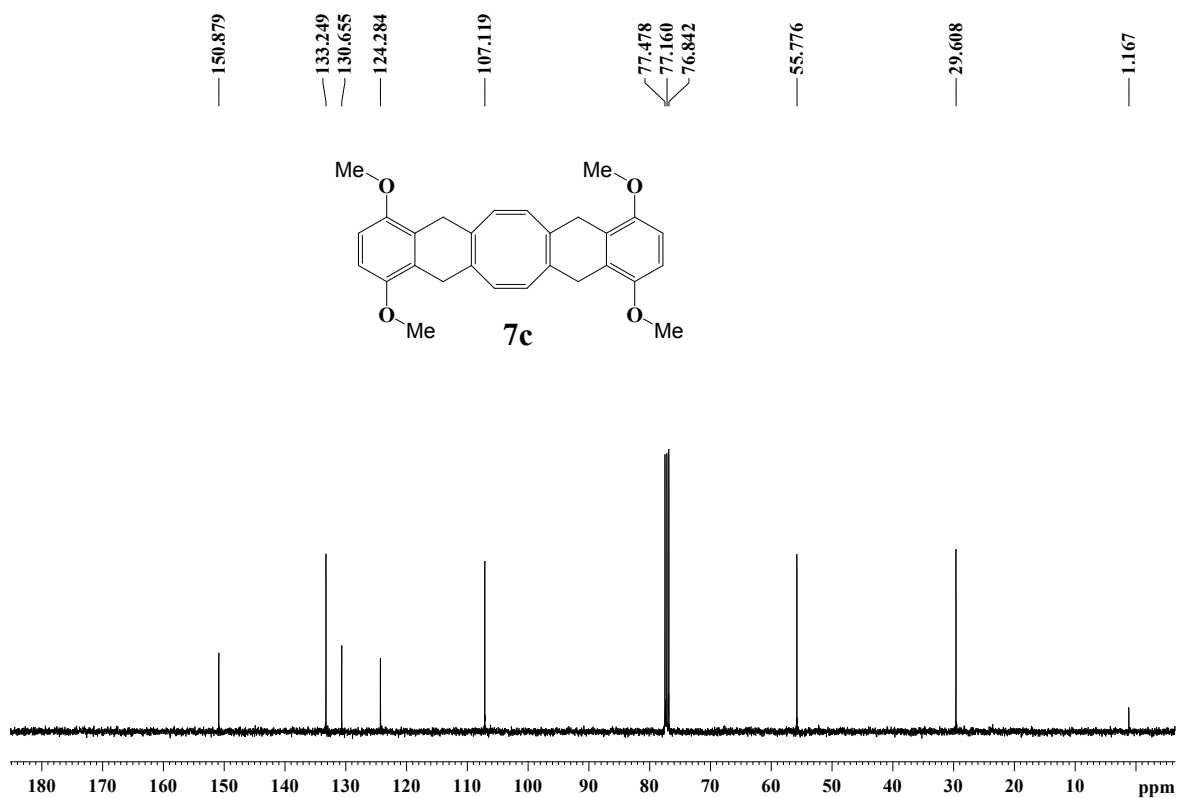

Figure 5 100 MHz  $^{13}\text{C}$  NMR spectrum of **7c** in  $\text{CDCl}_3$

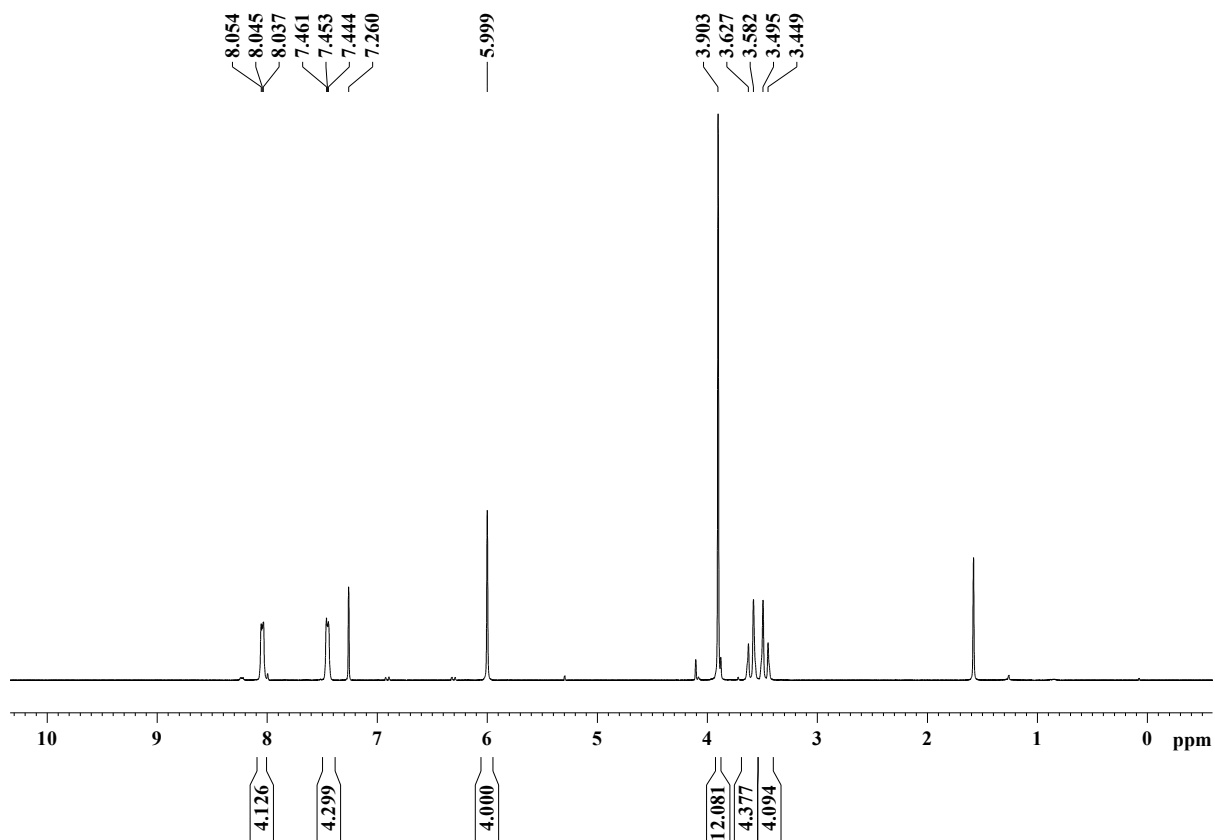

Figure 17 400 MHz  $^1\text{H}$  NMR spectrum of **8c** in  $\text{CDCl}_3$

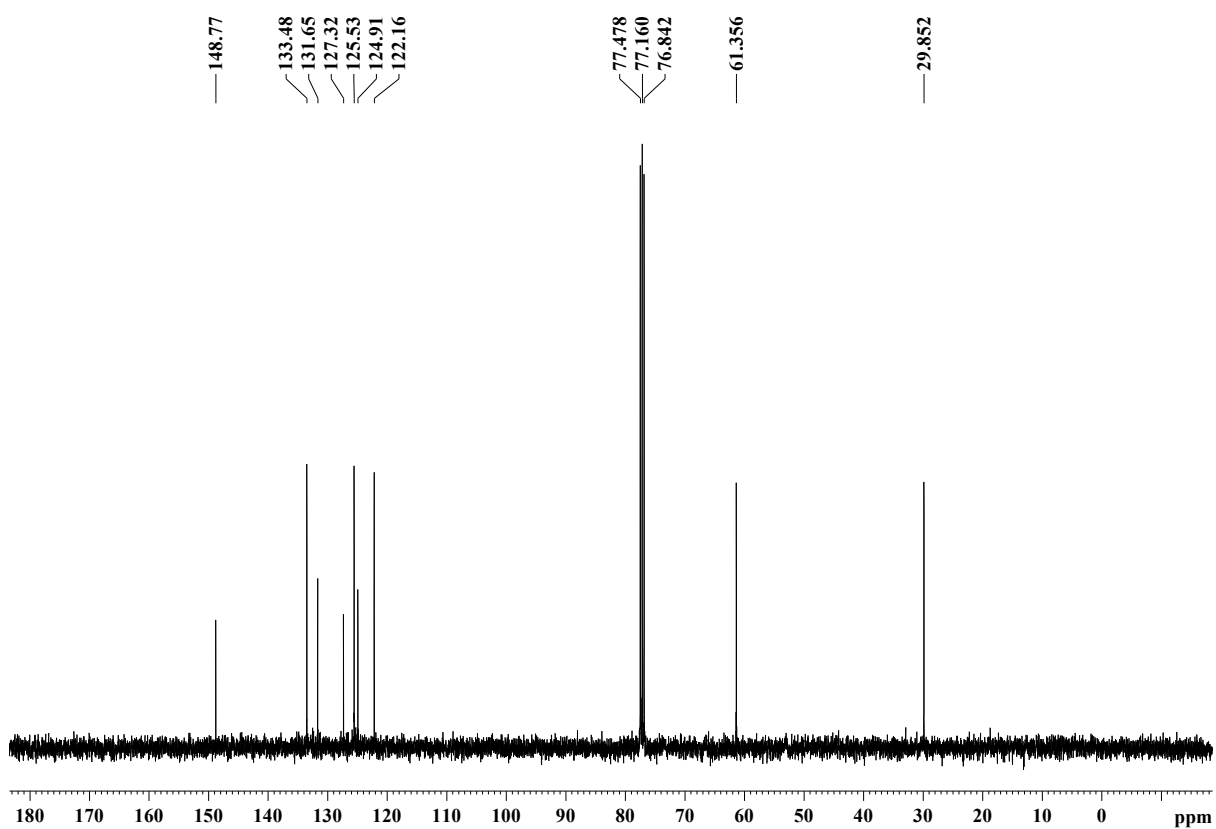

Figure 18 100 MHz  $^{13}\text{C}$  NMR spectrum of **8c** in  $\text{CDCl}_3$

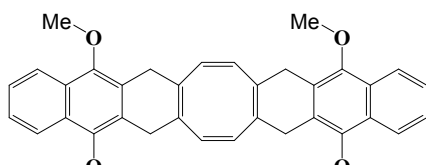

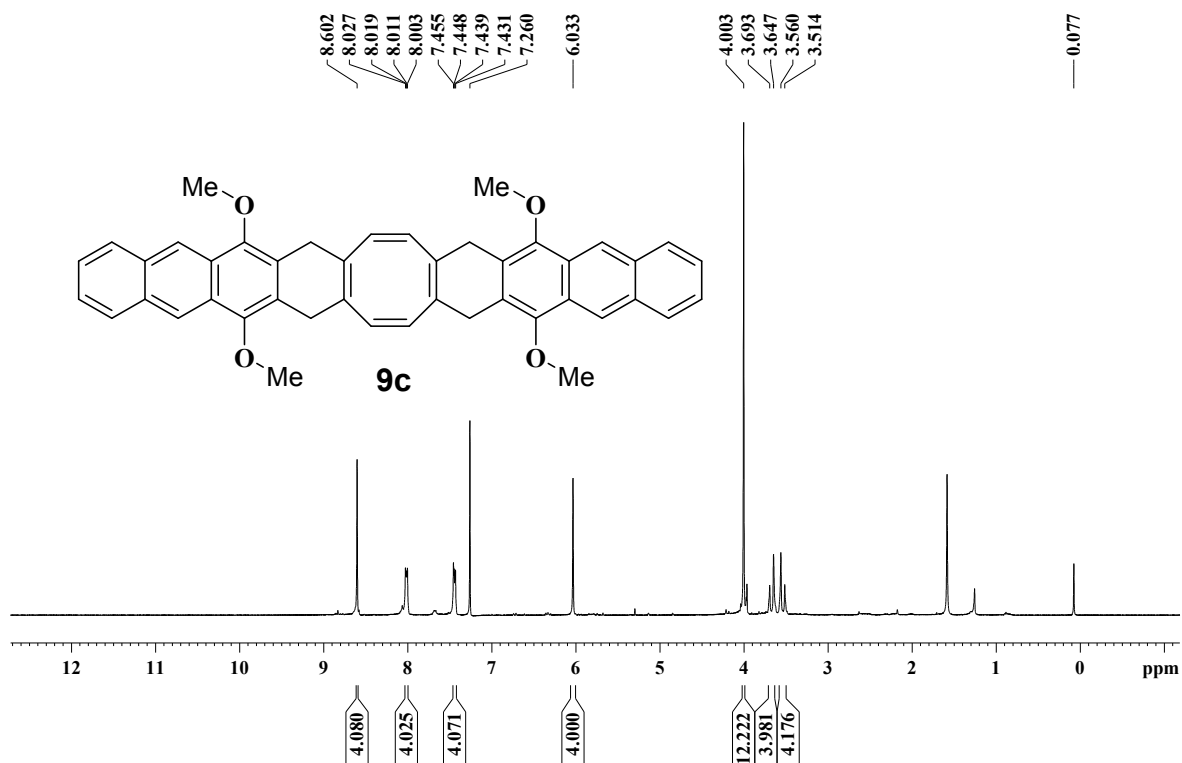

Figure 19 400 MHz  $^1\text{H}$  NMR spectrum of **9c** in  $\text{CDCl}_3$

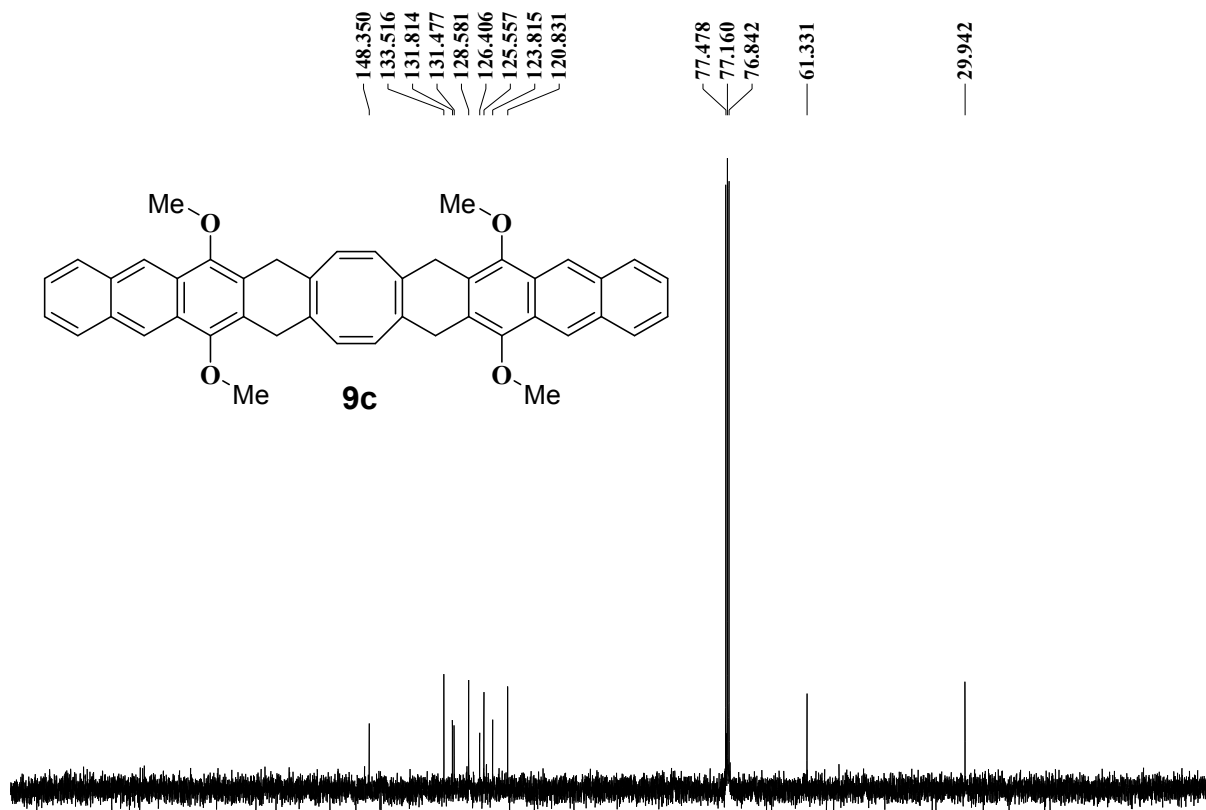

100 MHz  $^{13}\text{C}$  NMR spectrum of **9c** in  $\text{CDCl}_3$

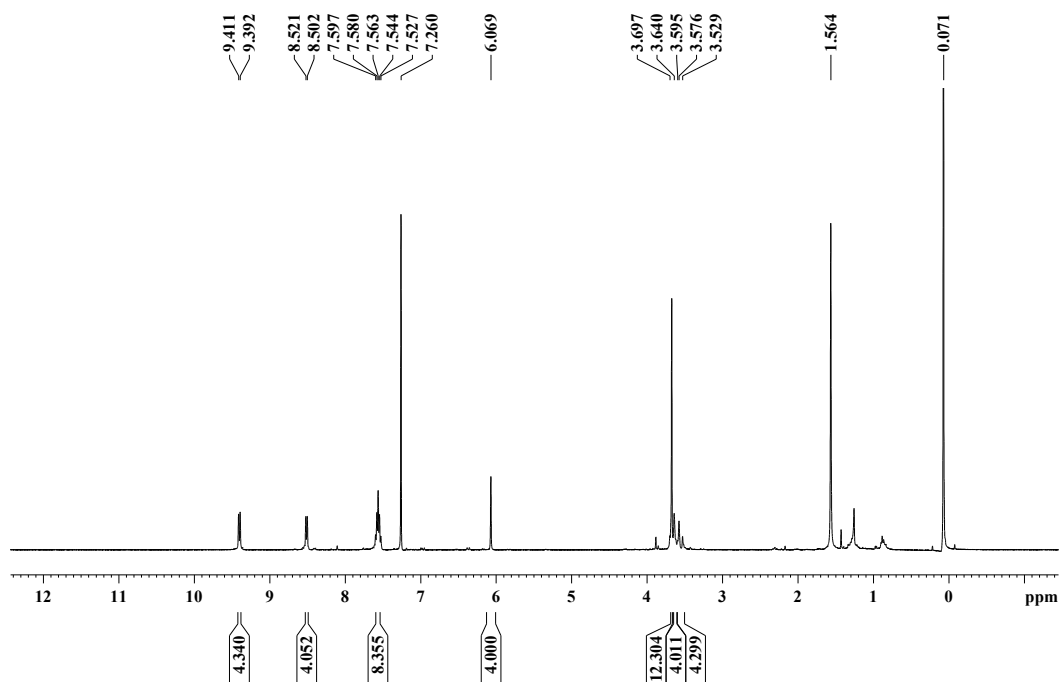

Figure 21 400 MHz  $^1\text{H}$  NMR spectrum of **10c** in  $\text{CDCl}_3$

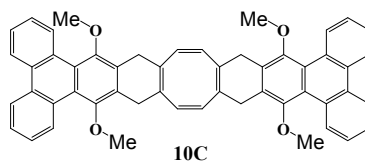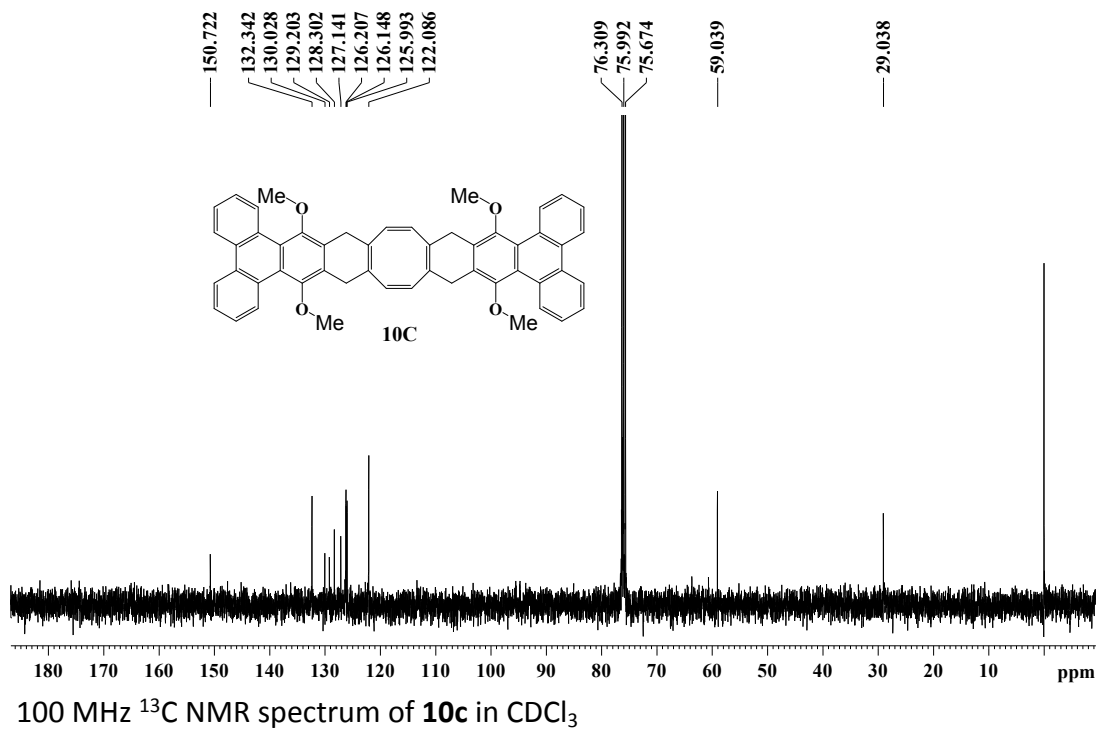

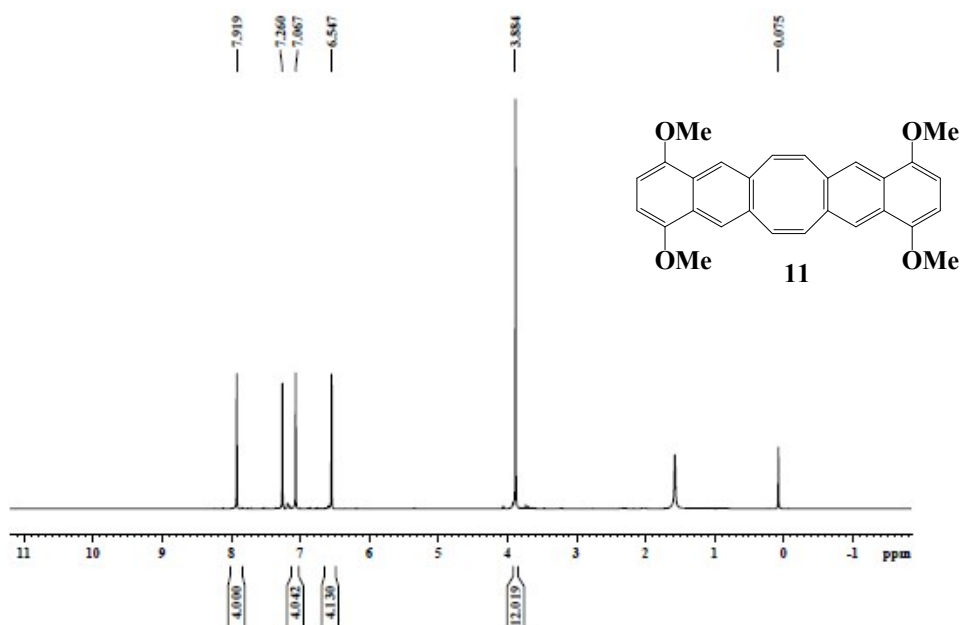

Figure 23 400 MHz  $^1\text{H}$  NMR spectrum of **11** in  $\text{CDCl}_3$

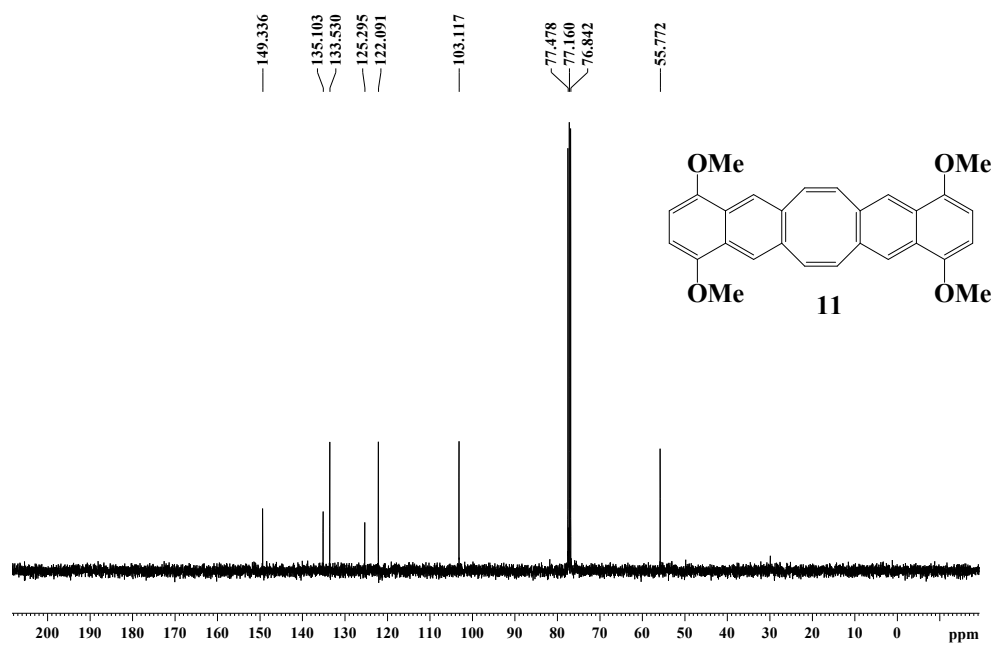

Figure 24 100 MHz  $^{13}\text{C}$  NMR spectrum of **11** in  $\text{CDCl}_3$

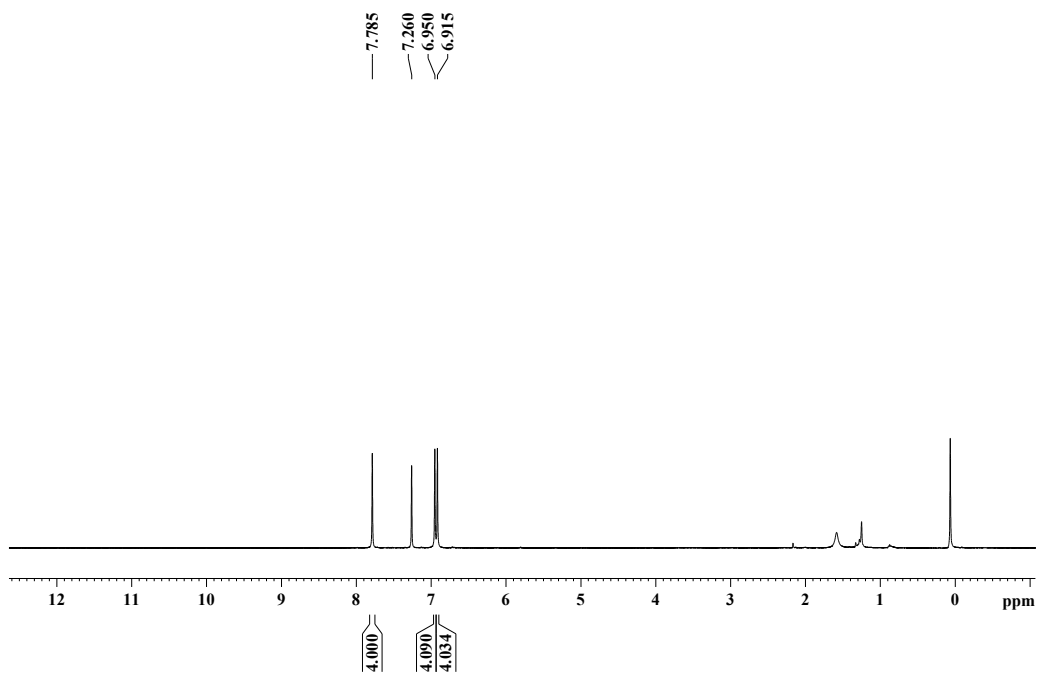

Figure 25 400 MHz  $^1\text{H}$  NMR spectrum of **12** in  $\text{CDCl}_3$

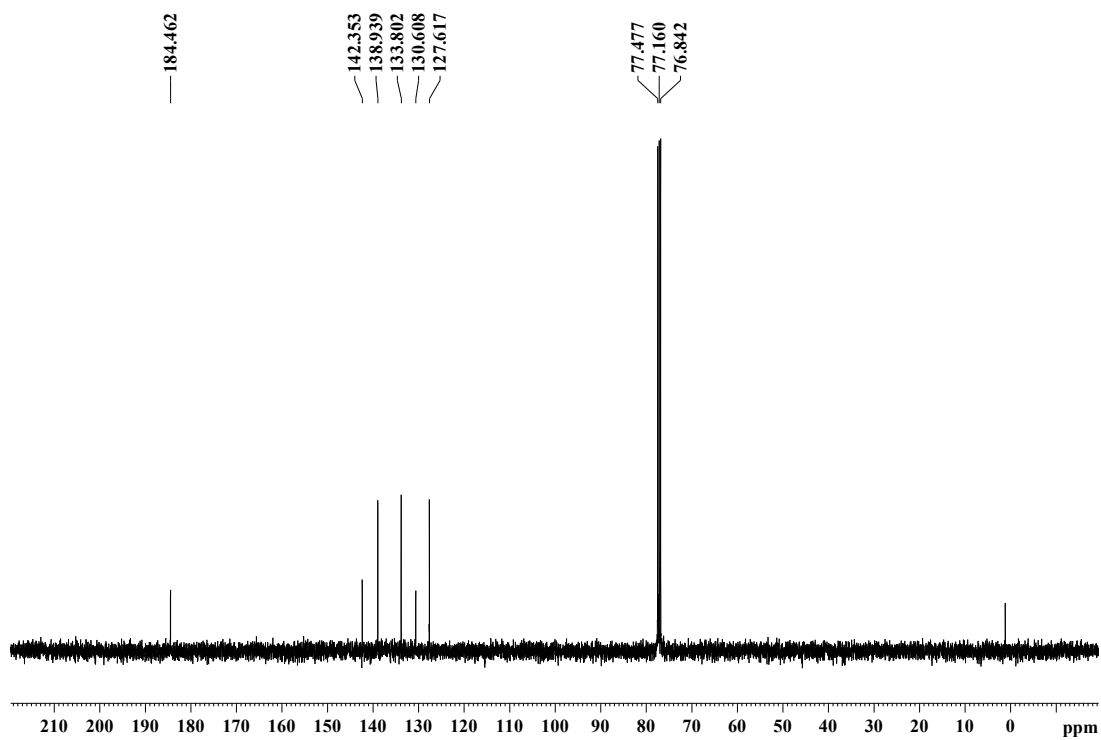

Figure 26 100 MHz  $^{13}\text{C}$  NMR spectrum of **12** in  $\text{CDCl}_3$

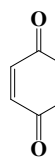

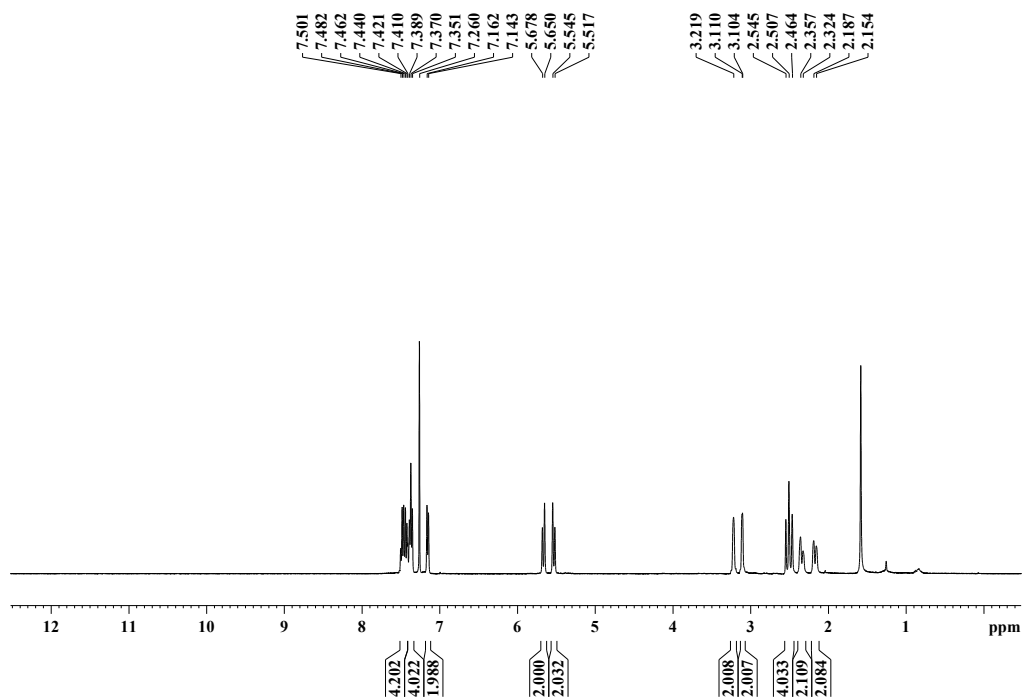

Figure 27 400 MHz  $^1\text{H}$  NMR spectrum of **13b** in  $\text{CDCl}_3$

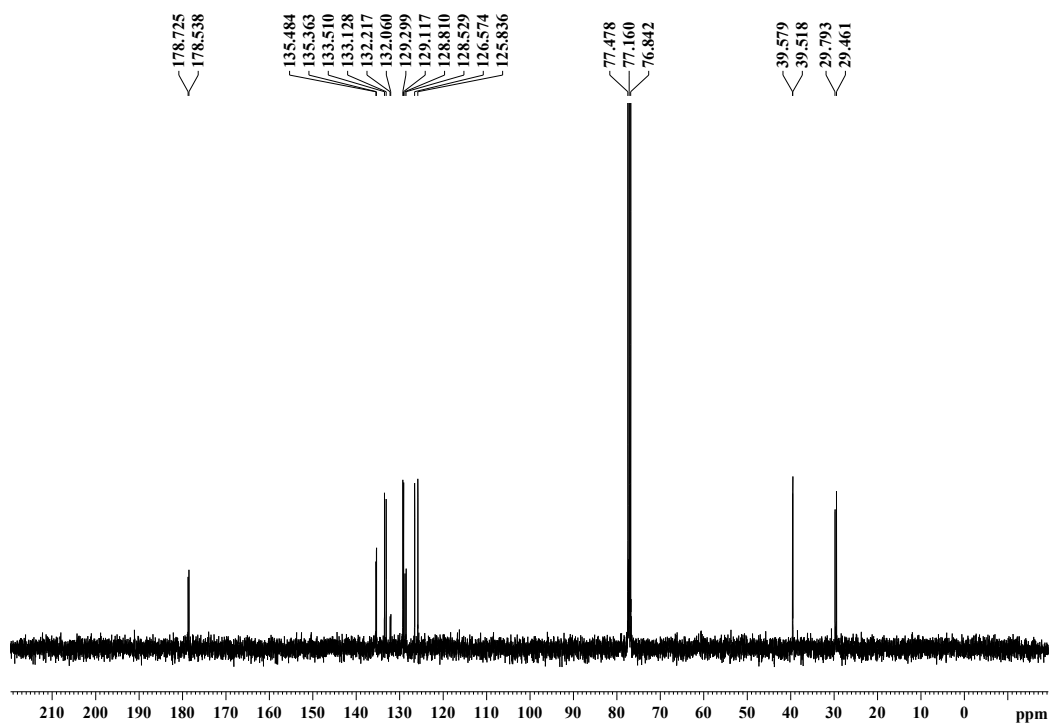

Figure 28 100 MHz  $^{13}\text{C}$  NMR spectrum of **13b** in  $\text{CDCl}_3$

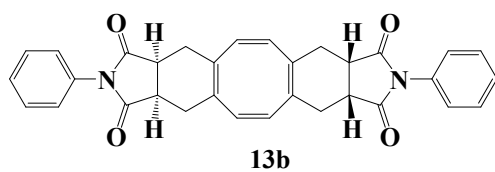



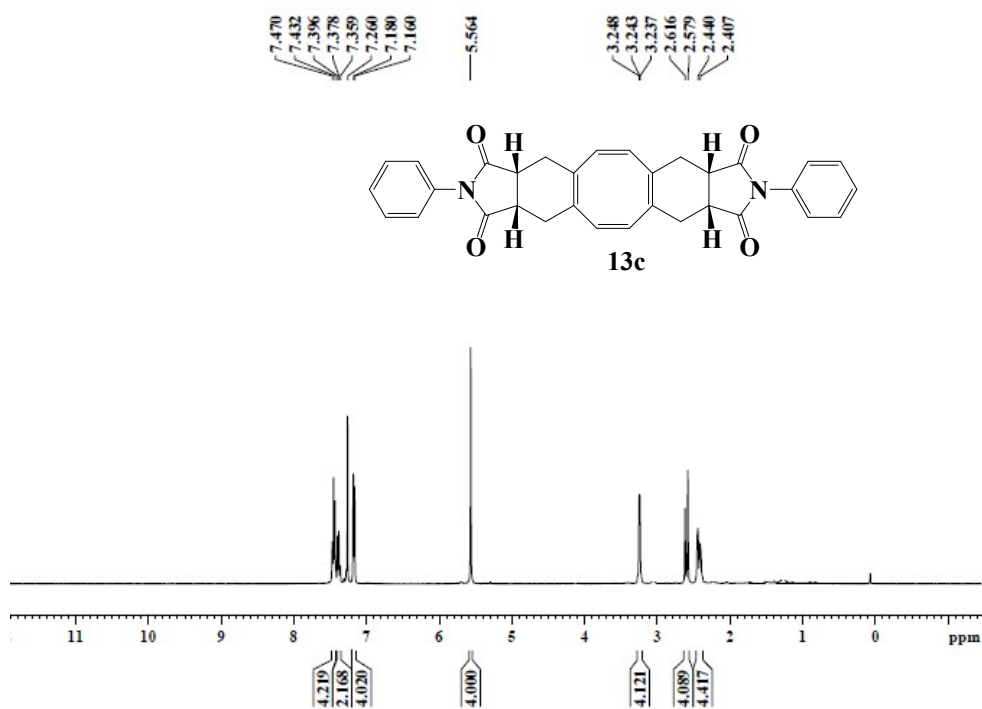

Figure 29 400 MHz  $^1\text{H}$  NMR spectrum of **13c** in  $\text{CDCl}_3$

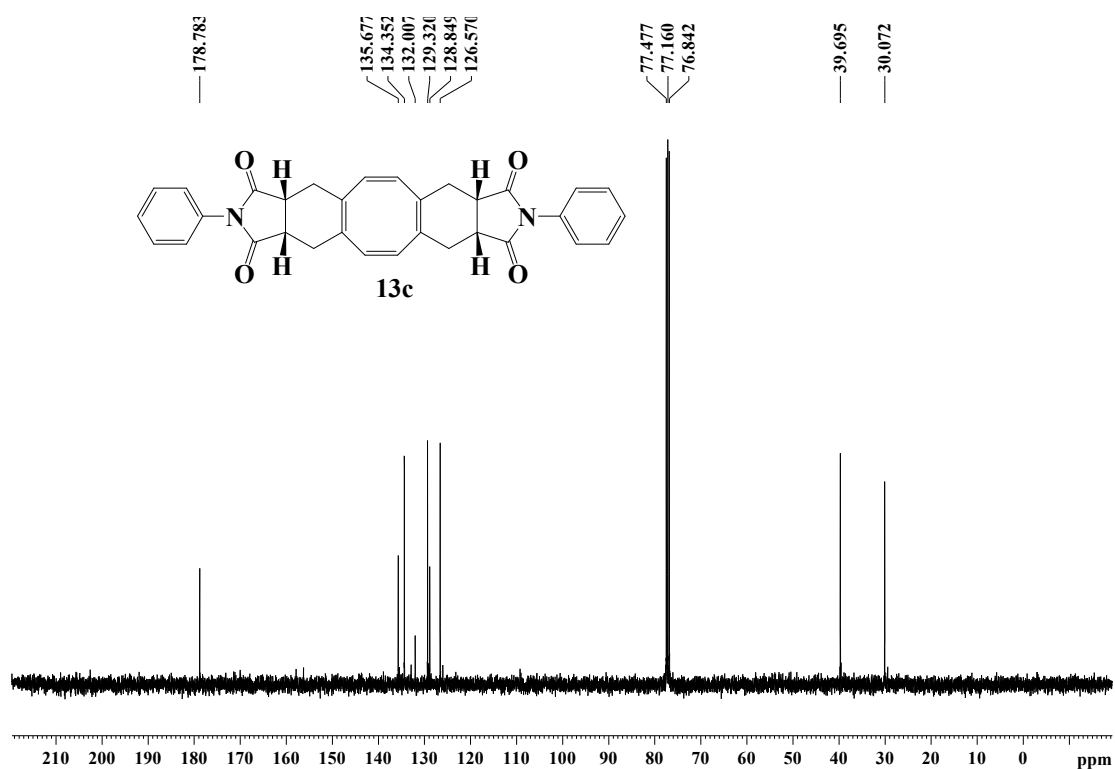

Figure 30 100 MHz  $^{13}\text{C}$  NMR spectrum of **13c** in  $\text{CDCl}_3$

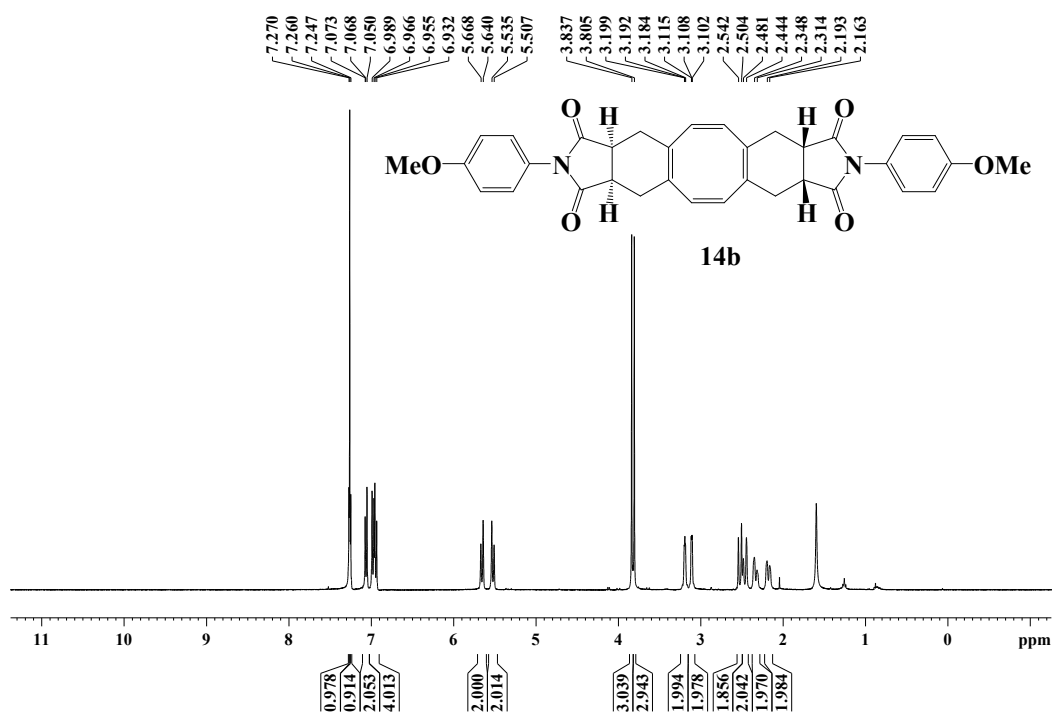

Figure 31 400 MHz  $^1\text{H}$  NMR spectrum of **14b** in  $\text{CDCl}_3$

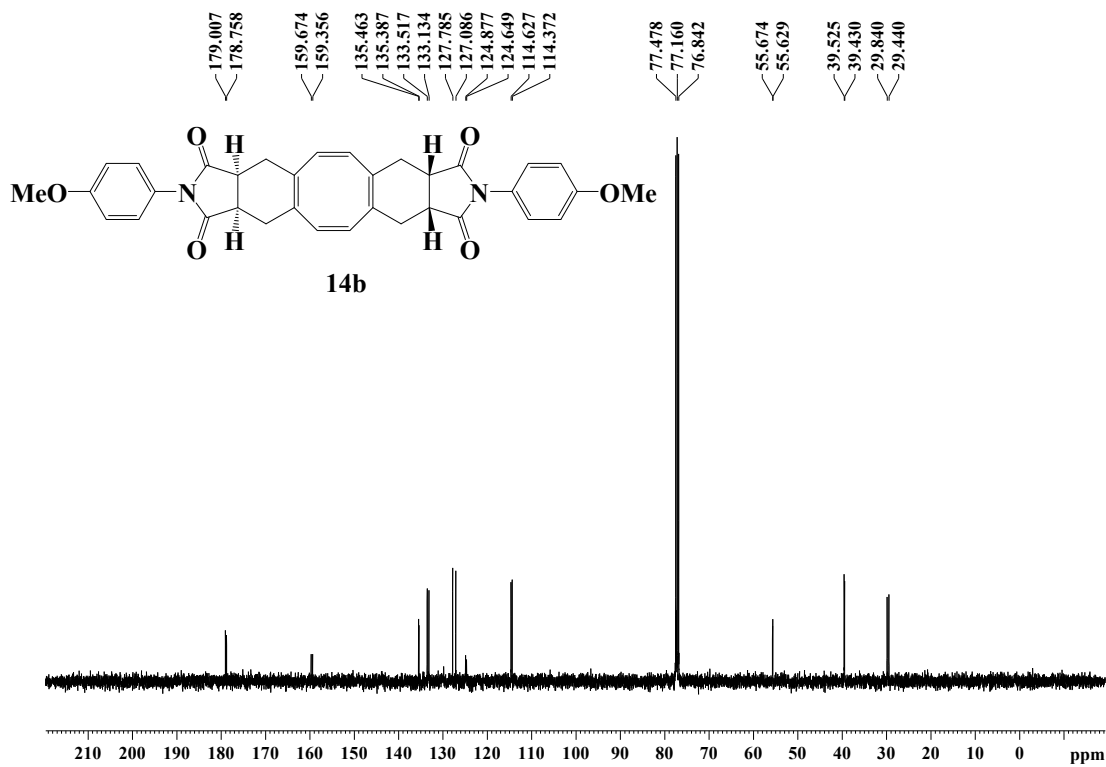

Figure 32 100 MHz  $^{13}\text{C}$  NMR spectrum of **14b** in  $\text{CDCl}_3$

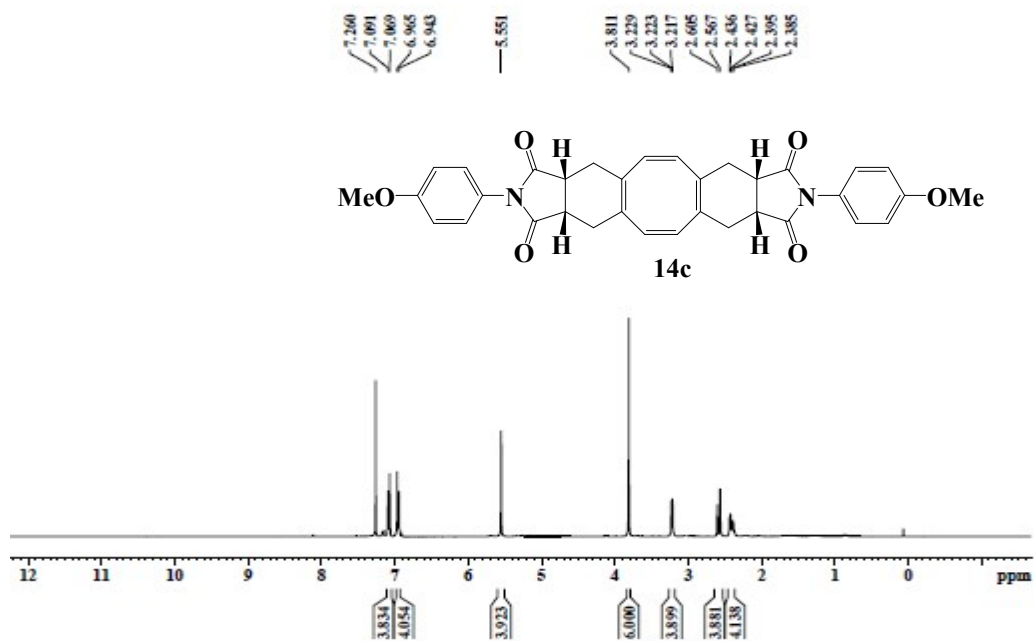

Figure 33 400 MHz  $^1\text{H}$  NMR spectrum of **14c** in  $\text{CDCl}_3$

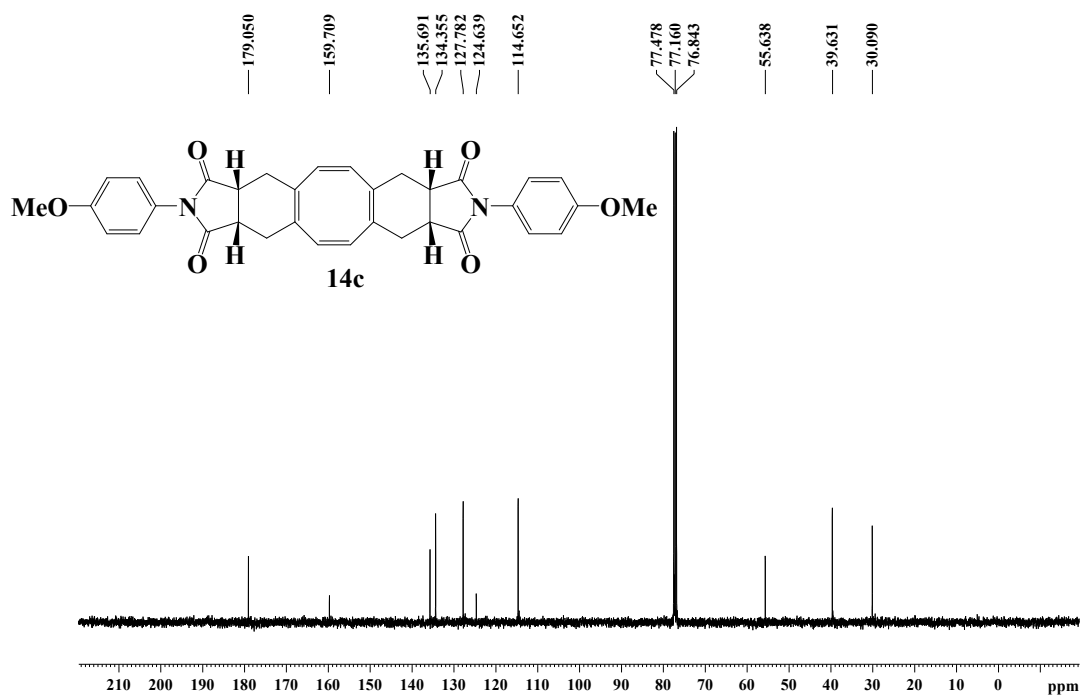

Figure 34 100 MHz  $^{13}\text{C}$  NMR spectrum of **14c** in  $\text{CDCl}_3$

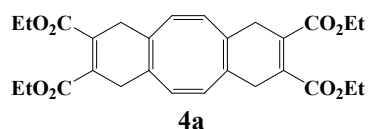**Table 1** Crystallographic data for **4a**

| Parameter                         | Data                                                                                              |
|-----------------------------------|---------------------------------------------------------------------------------------------------|
| CCDC Number                       | 2017969                                                                                           |
| Empirical Formula                 | C <sub>28</sub> H <sub>32</sub> O <sub>8</sub>                                                    |
| Formula weight                    | 496.53                                                                                            |
| Temperature                       | 296(2) K                                                                                          |
| Wavelength                        | 0.71073 Å                                                                                         |
| Crystal system, space group       | Tetragonal, I-4                                                                                   |
| Unit cell dimensions              | a = 31.5358(10) Å, alpha = 90°<br>b = 31.5358 (10) Å, beta = 90°<br>c = 5.2684 (2) Å, gamma = 90° |
| Volume                            | 5239.5(4) Å <sup>3</sup>                                                                          |
| Z, Calculated density             | 8, 1.259 Mg/m <sup>3</sup>                                                                        |
| Absorption coefficient            | 0.092 mm <sup>-1</sup>                                                                            |
| F(000)                            | 2112                                                                                              |
| Crystal size                      | 0.250 × 0.220 × 0.100 mm                                                                          |
| Theta range for data collection   | 0.913 to 24.785 deg                                                                               |
| Limiting indices                  | -36<=h<=37, -37<=k<=37, -5<=l<=6                                                                  |
| Reflections collected / unique    | 14835 / 4221 [R (int) = 0.0424]                                                                   |
| Completeness to theta = 24.990    | 94.2%                                                                                             |
| Absorption correction             | None                                                                                              |
| Refinement method                 | Full – matrix least – squares on F <sup>2</sup>                                                   |
| Data/ restraints / parameters     | 4221 / 1 / 320                                                                                    |
| Goodness-of-fit on F <sup>2</sup> | 0.939                                                                                             |
| Final R indices [I>2sigma(I)]     | R1 = 0.0514, wR2 = 0.1360                                                                         |
| R indices (all data)              | R1 = 0.0977, wR2 = 0.1715                                                                         |
| Extinction coefficient            | 0.0013 (6)                                                                                        |

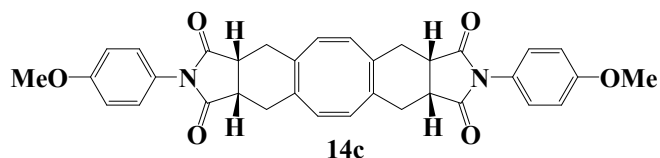**Table 2** Crystallographic data for **14c**

| Parameter                         | Data                                                                                                  |
|-----------------------------------|-------------------------------------------------------------------------------------------------------|
| CCDC Number                       | 2017970                                                                                               |
| Empirical Formula                 | C <sub>34</sub> H <sub>30</sub> N <sub>2</sub> O <sub>4</sub>                                         |
| Formula weight                    | 562.62                                                                                                |
| Temperature                       | 296(2) K                                                                                              |
| Wavelength                        | 0.71073 Å                                                                                             |
| Crystal system, space group       | Monoclinic, P2(1) / c                                                                                 |
| Unit cell dimensions              | a = 13.8398(4) Å, alpha = 90°<br>b = 21.1600 (3) Å, beta = 122.381°<br>c = 12.9507 (6) Å, gamma = 90° |
| Volume                            | 3156.79 (14) Å <sup>3</sup>                                                                           |
| Z, Calculated density             | 4, 1.248 Mg/ m <sup>3</sup>                                                                           |
| Absorption coefficient            | 0.083 mm <sup>-1</sup>                                                                                |
| F(000)                            | 1056                                                                                                  |
| Crystal size                      | 0.250 × 0.220 × 0.160 mm                                                                              |
| Theta range for data collection   | 2.095 to 24.989 deg                                                                                   |
| Limiting indices                  | -16 ≤ h ≤ 16, -11 ≤ k ≤ 11,<br>-23 ≤ l ≤ 23                                                           |
| Reflections collected / unique    | 15204 / 4008 [R (int) = 0.0432]                                                                       |
| Completeness to theta = 24.990    | 85.2%                                                                                                 |
| Absorption correction             | None                                                                                                  |
| Refinement method                 | Full – matrix least – squares on F <sup>2</sup>                                                       |
| Data/ restraints / parameters     | 4008 / 0 / 344                                                                                        |
| Goodness-of-fit on F <sup>2</sup> | 0.889                                                                                                 |
| Final R indices [I > 2σ(I)]       | R1 = 0.0493, wR2 = 0.1128                                                                             |
| R indices (all data)              | R1 = 0.0903, wR2 = 0.1295                                                                             |
| Extinction coefficient            | 0.0117 (12)                                                                                           |

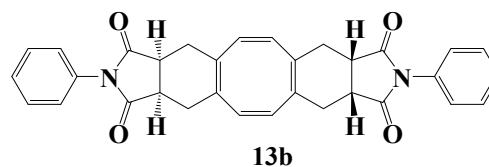**Table 3** Crystallographic data for **13b**

| Parameter                         | Data                                                                                            |
|-----------------------------------|-------------------------------------------------------------------------------------------------|
| CCDC Number                       | 2017972                                                                                         |
| Empirical Formula                 | C <sub>32</sub> H <sub>26</sub> N <sub>2</sub> O <sub>4</sub>                                   |
| Formula weight                    | 502.55                                                                                          |
| Temperature                       | 296(2) K                                                                                        |
| Wavelength                        | 0.71073 Å                                                                                       |
| Crystal system, space group       | Monoclinic, P2(1) / c                                                                           |
| Unit cell dimensions              | a = 13.8872(4) Å, alpha = 90°<br>b = 9.9072 (3) Å, beta = 90°<br>c = 19.4383 (6) Å, gamma = 90° |
| Volume                            | 2674.38(14) Å <sup>3</sup>                                                                      |
| Z, Calculated density             | 4, 1.248 Mg/ m <sup>3</sup>                                                                     |
| Absorption coefficient            | 0.083 mm <sup>-1</sup>                                                                          |
| F(000)                            | 1056                                                                                            |
| Crystal size                      | 0.250 × 0.220 × 0.160 mm                                                                        |
| Theta range for data collection   | 2.095 to 24.989 deg                                                                             |
| Limiting indices                  | -16 ≤ h ≤ 16, -11 ≤ k ≤ 11,<br>-23 ≤ l ≤ 23                                                     |
| Reflections collected / unique    | 15204 / 4008 [R (int) = 0.0432]                                                                 |
| Completeness to theta = 24.990    | 85.2%                                                                                           |
| Absorption correction             | None                                                                                            |
| Refinement method                 | Full – matrix least – squares on F <sup>2</sup>                                                 |
| Data/ restraints / parameters     | 4008 / 0 / 344                                                                                  |
| Goodness-of-fit on F <sup>2</sup> | 0.889                                                                                           |
| Final R indices [I > 2σ(I)]       | R1 = 0.0493, wR2 = 0.1128                                                                       |
| R indices (all data)              | R1 = 0.0903, wR2 = 0.1295                                                                       |
| Extinction coefficient            | 0.0117 (12)                                                                                     |
